# Supplementary material
Source: ML conference proceedings conference paper supplement (https://openreview.net/forum?id=ZuaVKlWdD2)
Supplement: supplementary_material [file attachment]

## Sheet: ZDOCK
pdb_id	RMSD	TM-score	DockQ	maxDockQ
8dls.pdb	16.81	0.5533	0.023	0.037
8dlr.pdb	25.28	0.552	0.007	0.007
8dfi.pdb	17.99	0.4078	0.034	0.029
8dfh.pdb	22.99	0.3855	0.009	0.012
8dcc.pdb	23.59	0.4751	0.017	0.035
8dad.pdb	16.01	0.5156	0.05	0.088
7zr8.pdb	21.79	0.5421	0.014	0.024
7zf8.pdb	12.87	0.5408	0.028	0.061
7xxl.pdb	17.95	0.482	0.028	0.035
7xh8.pdb	15.45	0.4967	0.064	0.056
7x26.pdb	22.06	0.5296	0.081	0.049
7wsl.pdb	17.83	0.4105	0.033	0.022
7wsi.pdb	25.47	0.5737	0.006	0.007
7ws6.pdb	15.04	0.4981	0.029	0.014
7ws2.pdb	15.39	0.4751	0.047	0.013
7wrz.pdb	20.27	0.4583	0.011	0.01
7wrv.pdb	16.81	0.477	0.031	0.012
7wro.pdb	15.86	0.4903	0.05	0.058
7wrl.pdb	16.2	0.5278	0.035	0.023
7wrj.pdb	8.8	0.5246	0.141	0.23
7wog.pdb	20.47	0.4703	0.021	0.012
7wlc.pdb	17.14	0.4881	0.016	0.018
7wef.pdb	16.25	0.4983	0.035	0.055
7wee.pdb	22.61	0.4827	0.007	0.017
7wed.pdb	11.1	0.5748	0.026	0.097
7wcr.pdb	19.75	0.4843	0.015	0.02
7wbz.pdb	19.4	0.5375	0.046	0.075
7urq.pdb	20.3	0.5088	0.136	0.027
7uaq.pdb	24.27	0.5665	0.009	0.013
7tty.pdb	23.92	0.4879	0.016	0.035
7ttx.pdb	16.3	0.4647	0.023	0.024
7ttm.pdb	16.62	0.4728	0.012	0.021
7tpj.pdb	23.36	0.6506	0.007	0.007
7tp4.pdb	21.98	0.5131	0.07	0.018
7tp3.pdb	21.87	0.476	0.026	0.03
7tlz.pdb	16.86	0.5793	0.052	0.032
7the.pdb	20.01	0.4943	0.044	0.04
7tc9.pdb	25.22	0.4619	0.01	0.009
7t8w.pdb	16.78	0.5222	0.022	0.042
7t7b.pdb	22.21	0.476	0.014	0.018
7t01.pdb	16.58	0.5696	0.062	0.078
7swp.pdb	22.69	0.4682	0.03	0.024
7su1.pdb	16.27	0.4147	0.043	0.076
7str.pdb	16.99	0.3903	0.03	0.01
7sem.pdb	24.25	0.668	0.01	0.025
7sd5.pdb	16.88	0.4747	0.014	0.022
7sbu.pdb	14.04	0.5323	0.037	0.057
7sbg.pdb	12.87	0.4292	0.033	0.017
7sbd.pdb	20	0.392	0.011	0.014
7sa6.pdb	18.36	0.4776	0.036	0.055
7s5p.pdb	20.92	0.5372	0.059	0.129
7rxp.pdb	18.24	0.4889	0.018	0.018
7rxi.pdb	15.69	0.5074	0.028	0.05
7rbu.pdb	23.45	0.5536	0.007	0.008
7qtk.pdb	21.44	0.4803	0.017	0.017
7n0a.pdb	22.79	0.4594	0.043	0.067
7lo8.pdb	24.04	0.6213	0.009	0.012
7lo7.pdb	24.07	0.6144	0.008	0.009
7kql.pdb	18.93	0.4024	0.038	0.015
7fjc.pdb	16.9	0.4779	0.06	0.073
7f7e.pdb	17.34	0.4798	0.023	0.021
7f6z.pdb	13.1	0.5604	0.042	0.079
7f6y.pdb	21.13	0.5191	0.025	0.038
7eng.pdb	18.15	0.4896	0.048	0.073
7ek0.pdb	18.88	0.5815	0.049	0.231
7ejz.pdb	11.1	0.6106	0.172	0.091
7ejy.pdb	17.57	0.5205	0.101	0.055
7e9p.pdb	21.17	0.4615	0.019	0.027
	18.8929±3.7853	0.5045±0.0596	0.0355±0.0316	0.0415±0.0425

## Sheet: ClusPro
pdb_id	RMSD	TM-score	DockQ	maxDockQ
8dls.pdb	3.79	0.8286	0.417	0.663
8dlr.pdb	23.82	0.55	0.005	0.007
8dfi.pdb	12.51	0.4561	0.084	0.087
8dfh.pdb	13.94	0.6532	0.067	0.098
8dcc.pdb	10.06	0.6171	0.115	0.129
8dad.pdb	0.8	0.9885	0.911	0.912
7zr8.pdb	13.79	0.5412	0.025	0.024
7zf8.pdb	6.1	0.6853	0.058	0.152
7xxl.pdb	25.58	0.4585	0.008	0.005
7xh8.pdb	11.68	0.6296	0.179	0.264
7x26.pdb	6.23	0.6892	0.267	0.391
7wsl.pdb	19.82	0.4206	0.014	0.03
7wsi.pdb	23.96	0.5738	0.006	0.007
7ws6.pdb	20.3	0.5242	0.031	0.025
7ws2.pdb	23.68	0.4762	0.023	0.014
7wrz.pdb	19.29	0.5618	0.034	0.041
7wrv.pdb	11.37	0.5404	0.051	0.022
7wro.pdb	11.28	0.6	0.044	0.024
7wrl.pdb	21.11	0.4587	0.009	0.013
7wrj.pdb	23.09	0.537	0.006	0.012
7wog.pdb	18.84	0.5304	0.017	0.011
7wlc.pdb	16.75	0.5148	0.047	0.065
7wef.pdb	15.34	0.5145	0.052	0.07
7wee.pdb	17.63	0.4921	0.025	0.034
7wed.pdb	22.56	0.5281	0.014	0.007
7wcr.pdb	17.35	0.5087	0.009	0.035
7wbz.pdb	18.21	0.5418	0.164	0.062
7urq.pdb	17.69	0.5304	0.108	0.066
7uaq.pdb	20.72	0.5625	0.007	0.009
7tty.pdb	20.16	0.4528	0.009	0.011
7ttx.pdb	15.93	0.5523	0.02	0.012
7ttm.pdb	19.3	0.5651	0.024	0.025
7tpj.pdb	23.11	0.6533	0.008	0.012
7tp4.pdb	23.58	0.4629	0.011	0.008
7tp3.pdb	21.77	0.5448	0.015	0.009
7tlz.pdb	17.25	0.549	0.015	0.017
7the.pdb	14.42	0.5088	0.088	0.102
7tc9.pdb	12.12	0.688	0.177	0.465
7t8w.pdb	4.49	0.7726	0.234	0.327
7t7b.pdb	15.79	0.5517	0.022	0.013
7t01.pdb	19.13	0.4897	0.008	0.022
7swp.pdb	15.36	0.5699	0.025	0.014
7su1.pdb	19.16	0.4024	0.019	0.043
7str.pdb	17.25	0.4367	0.02	0.011
7sem.pdb	7.33	0.8301	0.271	0.516
7sd5.pdb	24.33	0.5575	0.034	0.017
7sbu.pdb	25.12	0.4604	0.012	0.006
7sbg.pdb	17.43	0.4456	0.053	0.116
7sbd.pdb	13.53	0.6549	0.07	0.085
7sa6.pdb	20.6	0.5323	0.02	0.006
7s5p.pdb	9.99	0.5705	0.093	0.175
7rxp.pdb	16.45	0.746	0.012	0.012
7rxi.pdb	7.92	0.7735	0.084	0.095
7rbu.pdb	22.46	0.5528	0.008	0.008
7qtk.pdb	19.35	0.5391	0.03	0.018
7n0a.pdb	1.66	0.9538	0.72	0.8
7lo8.pdb	3.41	0.8752	0.377	0.475
7lo7.pdb	21.15	0.6154	0.017	0.017
7kql.pdb	1.71	0.9431	0.761	0.808
7fjc.pdb	23.47	0.5472	0.007	0.037
7f7e.pdb	24.18	0.4705	0.006	0.012
7f6z.pdb	3.14	0.863	0.228	0.364
7f6y.pdb	2.55	0.9048	0.409	0.616
7eng.pdb	19.55	0.4678	0.01	0.019
7ek0.pdb	16.02	0.5333	0.079	0.056
7ejz.pdb	17.65	0.5416	0.109	0.053
7ejy.pdb	2.53	0.901	0.401	0.504
7e9p.pdb	17.9	0.5113	0.017	0.055
	15.6697±6.8958	0.5956±0.1431	0.1076±0.1827	0.1359±0.2213

## Sheet: HDOCK
pdb_id	RMSD	TM-score	DockQ	maxDockQ
8dls.pdb	19.43	0.5522	0.036	0.034
8dlr.pdb	14.87	0.5916	0.032	0.045
8dfi.pdb	11.33	0.7332	0.05	0.063
8dfh.pdb	21.18	0.4192	0.014	0.016
8dcc.pdb	17.95	0.5693	0.016	0.016
8dad.pdb	21.63	0.5444	0.025	0.013
7zr8.pdb	19.68	0.533	0.013	0.016
7zf8.pdb	1.45	0.9645	0.72	0.874
7xxl.pdb	19.18	0.565	0.032	0.027
7xh8.pdb	17.78	0.5715	0.02	0.045
7x26.pdb	24.36	0.5123	0.008	0.008
7wsl.pdb	10.72	0.7027	0.06	0.061
7wsi.pdb	20.43	0.4872	0.017	0.033
7ws6.pdb	13.7	0.5615	0.042	0.015
7ws2.pdb	13.69	0.5741	0.041	0.015
7wrz.pdb	21.28	0.5534	0.026	0.013
7wrv.pdb	23.38	0.5264	0.006	0.009
7wro.pdb	16.81	0.5858	0.021	0.011
7wrl.pdb	14.21	0.5989	0.033	0.026
7wrj.pdb	21.7	0.5578	0.029	0.033
7wog.pdb	20.3	0.5721	0.022	0.01
7wlc.pdb	20.44	0.533	0.03	0.021
7wef.pdb	7.86	0.6415	0.102	0.104
7wee.pdb	17.55	0.5403	0.024	0.021
7wed.pdb	20.99	0.5289	0.077	0.056
7wcr.pdb	19.3	0.5548	0.028	0.025
7wbz.pdb	14.66	0.5837	0.088	0.083
7urq.pdb	0.8	0.9889	0.513	0.948
7uaq.pdb	18.39	0.5283	0.011	0.017
7tty.pdb	19.57	0.5478	0.01	0.012
7ttx.pdb	16.87	0.556	0.019	0.011
7ttm.pdb	13.09	0.5896	0.026	0.091
7tpj.pdb	22.14	0.6411	0.01	0.011
7tp4.pdb	19.37	0.5493	0.02	0.009
7tp3.pdb	20.2	0.5544	0.035	0.033
7tlz.pdb	1.3	0.9773	0.903	0.94
7the.pdb	22.81	0.5511	0.04	0.056
7tc9.pdb	18.98	0.5582	0.019	0.047
7t8w.pdb	6.68	0.8978	0.068	0.07
7t7b.pdb	19.27	0.5654	0.025	0.014
7t01.pdb	18.14	0.5883	0.054	0.077
7swp.pdb	11.9	0.5646	0.033	0.023
7su1.pdb	1.4	0.9602	0.329	0.774
7str.pdb	15.35	0.6763	0.036	0.012
7sem.pdb	32.11	0.567	0.008	0.01
7sd5.pdb	20.91	0.5646	0.021	0.025
7sbu.pdb	8.86	0.5824	0.022	0.194
7sbg.pdb	13.08	0.6708	0.049	0.014
7sbd.pdb	13.39	0.669	0.137	0.083
7sa6.pdb	23.47	0.3832	0.011	0.008
7s5p.pdb	14.33	0.5391	0.013	0.065
7rxp.pdb	7.87	0.796	0.074	0.112
7rxi.pdb	10.36	0.7691	0.03	0.035
7rbu.pdb	12.13	0.5575	0.022	0.031
7qtk.pdb	14.66	0.5568	0.029	0.015
7n0a.pdb	18.54	0.564	0.021	0.035
7lo8.pdb	17.58	0.4972	0.011	0.013
7lo7.pdb	22.72	0.4832	0.009	0.014
7kql.pdb	12.07	0.6848	0.037	0.039
7fjc.pdb	21.58	0.4443	0.012	0.026
7f7e.pdb	11.47	0.6148	0.048	0.039
7f6z.pdb	15.17	0.5838	0.088	0.089
7f6y.pdb	15.16	0.5833	0.089	0.09
7eng.pdb	18.91	0.4574	0.015	0.012
7ek0.pdb	15.16	0.5839	0.094	0.095
7ejz.pdb	1.27	0.9719	0.737	0.799
7ejy.pdb	1.13	0.9776	0.755	0.807
7e9p.pdb	18.9	0.5714	0.029	0.027
	15.7787±6.4117	0.6121±0.1383	0.0901±0.1888	0.1105±0.2372

## Sheet: EquiDock
pdb_id	RMSD	TM-score	DockQ	maxDockQ
7e9p.pdb	19.87	0.4912	0.025	0.025
7ejy.pdb	17.52	0.5121	0.037	0.037
7ejz.pdb	17.34	0.5108	0.035	0.035
7ek0.pdb	17	0.5168	0.041	0.041
7eng.pdb	16.43	0.5249	0.036	0.036
7f6y.pdb	17.38	0.5111	0.033	0.033
7f6z.pdb	17.43	0.515	0.032	0.032
7f7e.pdb	20.93	0.5061	0.028	0.028
7fjc.pdb	19.43	0.4906	0.044	0.044
7kql.pdb	16.36	0.438	0.068	0.068
7lo7.pdb	23.59	0.2084	0.031	0.031
7lo8.pdb	24.47	0.1994	0.034	0.034
7n0a.pdb	19.95	0.4609	0.016	0.016
7qtk.pdb	16.93	0.5263	0.04	0.04
7rbu.pdb	15.25	0.6201	0.051	0.051
7rxi.pdb	15.01	0.4807	0.049	0.049
7rxp.pdb	19.99	0.4686	0.058	0.058
7s5p.pdb	20.03	0.522	0.026	0.026
7sa6.pdb	19.37	0.4909	0.026	0.026
7sbd.pdb	18.32	0.4441	0.063	0.063
7sbg.pdb	20.06	0.4531	0.053	0.053
7sbu.pdb	19.46	0.5008	0.03	0.03
7sd5.pdb	22.38	0.4795	0.019	0.019
7sem.pdb	16.28	0.697	0.028	0.028
7str.pdb	22.35	0.4504	0.053	0.053
7su1.pdb	20.44	0.3994	0.037	0.037
7swp.pdb	22.44	0.5069	0.038	0.038
7t01.pdb	16.65	0.5231	0.038	0.038
7t7b.pdb	15.07	0.5441	0.065	0.065
7t8w.pdb	18.86	0.5027	0.085	0.085
7tc9.pdb	19.92	0.5144	0.042	0.042
7the.pdb	15.14	0.556	0.067	0.067
7tlz.pdb	15.85	0.6025	0.057	0.057
7tp3.pdb	21.04	0.1949	0.036	0.036
7tp4.pdb	22.63	0.1773	0.035	0.035
7tpj.pdb	11.5	0.7253	0.073	0.073
7ttm.pdb	20.49	0.5027	0.033	0.033
7ttx.pdb	20.44	0.4897	0.027	0.027
7tty.pdb	22.02	0.4859	0.024	0.024
7uaq.pdb	15.55	0.6186	0.043	0.043
7urq.pdb	18.82	0.5166	0.038	0.038
7wbz.pdb	16.06	0.5595	0.068	0.068
7wcr.pdb	14.44	0.5518	0.072	0.072
7wed.pdb	22.37	0.524	0.034	0.034
7wee.pdb	17.66	0.5293	0.035	0.035
7wef.pdb	20.33	0.5084	0.028	0.028
7wlc.pdb	16.6	0.5336	0.05	0.05
7wog.pdb	15.09	0.5569	0.07	0.07
7wrj.pdb	20.19	0.5389	0.056	0.056
7wrl.pdb	19.17	0.5239	0.043	0.043
7wro.pdb	20.8	0.5036	0.035	0.035
7wrv.pdb	15.48	0.5193	0.037	0.037
7wrz.pdb	22.16	0.4828	0.023	0.023
7ws2.pdb	13.22	0.6112	0.114	0.114
7ws6.pdb	14.21	0.5554	0.046	0.046
7wsi.pdb	17.74	0.6071	0.027	0.027
7wsl.pdb	16.02	0.4357	0.072	0.072
7x26.pdb	18.16	0.5274	0.032	0.032
7xh8.pdb	17.97	0.5091	0.047	0.047
7xxl.pdb	17.24	0.5331	0.04	0.04
7zf8.pdb	15.02	0.5473	0.062	0.062
7zr8.pdb	16.93	0.5857	0.042	0.042
8dad.pdb	20.58	0.5152	0.039	0.039
8dcc.pdb	22.62	0.5099	0.032	0.032
8dfh.pdb	20.13	0.4136	0.022	0.022
8dfi.pdb	18.55	0.4412	0.029	0.029
8dlr.pdb	17.18	0.6032	0.041	0.041
8dls.pdb	19.91	0.5874	0.045	0.045
	18.4679±2.7269	0.5028±0.0964	0.0432±0.0175	0.0432±0.0175

## Sheet: Multimer
pdb_id	RMSD	TM-score	DockQ	maxDockQ
8dls.pdb	19.26	0.5649	0.048	0.061
8dlr.pdb	13.67	0.5381	0.021	0.022
8dfi.pdb	9.54	0.7663	0.077	0.089
8dfh.pdb	10.74	0.7479	0.06	0.06
8dcc.pdb	19.26	0.5721	0.05	0.028
8dad.pdb	4.02	0.806	0.388	0.436
7zr8.pdb	20.1	0.5591	0.056	0.09
7zf8.pdb	12.94	0.6171	0.039	0.024
7xxl.pdb	10.59	0.5988	0.083	0.424
7xh8.pdb	13.03	0.639	0.061	0.134
7x26.pdb	1.42	0.97	0.682	0.802
7wsl.pdb	2.01	0.928	0.54	0.567
7wsi.pdb	22.87	0.4991	0.006	0.006
7ws6.pdb	12.94	0.5794	0.066	0.081
7ws2.pdb	14.26	0.5883	0.084	0.093
7wrz.pdb	19.42	0.591	0.053	0.082
7wrv.pdb	16.12	0.5774	0.051	0.087
7wro.pdb	17.81	0.5925	0.049	0.016
7wrl.pdb	17.59	0.5522	0.028	0.01
7wrj.pdb	15.1	0.5855	0.032	0.04
7wog.pdb	23.02	0.5702	0.075	0.033
7wlc.pdb	10	0.6209	0.123	0.157
7wef.pdb	11.63	0.5699	0.043	0.022
7wee.pdb	12.51	0.5737	0.049	0.024
7wed.pdb	7.98	0.6463	0.125	0.233
7wcr.pdb	1.18	0.9785	0.804	0.851
7wbz.pdb	18.28	0.5662	0.124	0.05
7urq.pdb	16.42	0.5967	0.03	0.014
7uaq.pdb	23.61	0.5291	0.015	0.022
7tty.pdb	18.86	0.5716	0.021	0.013
7ttx.pdb	18.87	0.5594	0.025	0.011
7ttm.pdb	19.27	0.5603	0.016	0.008
7tpj.pdb	17.12	0.6847	0.055	0.047
7tp4.pdb	20.41	0.5448	0.035	0.017
7tp3.pdb	18.95	0.5779	0.038	0.136
7tlz.pdb	11.28	0.5618	0.018	0.021
7the.pdb	7.64	0.5956	0.101	0.161
7tc9.pdb	6.27	0.6892	0.195	0.147
7t8w.pdb	7.91	0.8569	0.04	0.04
7t7b.pdb	17.84	0.5679	0.021	0.01
7t01.pdb	14.31	0.5867	0.061	0.08
7swp.pdb	1.71	0.956	0.676	0.796
7su1.pdb	1.3	0.9657	0.311	0.785
7str.pdb	1.42	0.9647	0.672	0.733
7sem.pdb	19.88	0.5882	0.03	0.039
7sd5.pdb	18.6	0.5788	0.025	0.011
7sbu.pdb	11.71	0.5833	0.042	0.034
7sbg.pdb	9.45	0.6865	0.07	0.018
7sbd.pdb	6.94	0.7243	0.117	0.07
7sa6.pdb	17.4	0.5756	0.03	0.02
7s5p.pdb	13.93	0.5702	0.041	0.041
7rxp.pdb	11.82	0.7703	0.043	0.029
7rxi.pdb	8.04	0.8086	0.056	0.123
7rbu.pdb	17.31	0.5441	0.01	0.012
7qtk.pdb	13.35	0.5582	0.076	0.072
7n0a.pdb	17.02	0.5869	0.027	0.007
7lo8.pdb	9.35	0.6785	0.076	0.107
7lo7.pdb	25.08	0.5422	0.005	0.005
7kql.pdb	7.91	0.758	0.085	0.087
7fjc.pdb	12.01	0.6182	0.05	0.084
7f7e.pdb	12.01	0.6208	0.056	0.03
7f6z.pdb	16.12	0.5828	0.037	0.014
7f6y.pdb	16.46	0.582	0.037	0.014
7eng.pdb	17.41	0.565	0.024	0.009
7ek0.pdb	17.81	0.5699	0.194	0.053
7ejz.pdb	15.36	0.5742	0.053	0.025
7ejy.pdb	15.24	0.5734	0.043	0.024
7e9p.pdb	17.56	0.5532	0.02	0.016
	13.6507±5.8863	0.6406±0.1241	0.1087±0.1739	0.1251±0.2144

## Sheet: BiDock
pdb_id	RMSD	TM-score	DockQ	maxDockQ
8dls.pdb	1.8	0.9524	0.674	0.717
8dlr.pdb	1.89	0.9489	0.636	0.778
8dfi.pdb	9.53	0.7569	0.062	0.063
8dfh.pdb	6.78	0.7737	0.12	0.132
8dcc.pdb	0.59	0.9947	0.914	0.972
8dad.pdb	0.85	0.9874	0.816	0.83
7zr8.pdb	0.75	0.9915	0.809	0.9
7zf8.pdb	1.02	0.9824	0.843	0.958
7xxl.pdb	11.17	0.5835	0.067	0.429
7xh8.pdb	1.06	0.9809	0.757	0.793
7x26.pdb	3.42	0.8463	0.408	0.639
7wsl.pdb	0.68	0.9899	0.871	0.896
7wsi.pdb	26.72	0.5796	0.01	0.015
7ws6.pdb	20.81	0.5262	0.019	0.027
7ws2.pdb	13.11	0.5523	0.027	0.033
7wrz.pdb	19.62	0.5612	0.017	0.009
7wrv.pdb	2.42	0.9107	0.468	0.68
7wro.pdb	22.08	0.5531	0.028	0.024
7wrl.pdb	15.63	0.5593	0.026	0.015
7wrj.pdb	15.33	0.591	0.124	0.153
7wog.pdb	18.4	0.5655	0.029	0.009
7wlc.pdb	21.43	0.5658	0.051	0.136
7wef.pdb	19.16	0.5346	0.015	0.025
7wee.pdb	2.31	0.9212	0.673	0.742
7wed.pdb	2.14	0.9352	0.61	0.607
7wcr.pdb	1.07	0.9811	0.755	0.806
7wbz.pdb	0.91	0.9872	0.774	0.872
7urq.pdb	0.28	0.9985	0.511	0.977
7uaq.pdb	18.91	0.5848	0.052	0.024
7tty.pdb	17.9	0.5831	0.042	0.064
7ttx.pdb	22.31	0.5763	0.068	0.059
7ttm.pdb	17.97	0.5792	0.041	0.038
7tpj.pdb	17.48	0.6686	0.058	0.039
7tp4.pdb	19.51	0.554	0.018	0.011
7tp3.pdb	24.2	0.5484	0.037	0.015
7tlz.pdb	0.45	0.9967	0.983	0.986
7the.pdb	2.94	0.8785	0.179	0.542
7tc9.pdb	20.27	0.5609	0.03	0.053
7t8w.pdb	0.46	0.9941	0.925	0.939
7t7b.pdb	1.89	0.9442	0.188	0.663
7t01.pdb	4.14	0.7962	0.38	0.397
7swp.pdb	3.19	0.8664	0.395	0.564
7su1.pdb	0.69	0.9899	0.359	0.891
7str.pdb	1.29	0.9683	0.607	0.624
7sem.pdb	20.16	0.6803	0.059	0.174
7sd5.pdb	19.79	0.5702	0.041	0.023
7sbu.pdb	8.56	0.6348	0.083	0.183
7sbg.pdb	14.3	0.6617	0.067	0.112
7sbd.pdb	13.96	0.6613	0.041	0.031
7sa6.pdb	1.24	0.9736	0.814	0.758
7s5p.pdb	0.94	0.9857	0.475	0.785
7rxp.pdb	6.58	0.7836	0.058	0.086
7rxi.pdb	1.61	0.9432	0.339	0.666
7rbu.pdb	14.42	0.5901	0.046	0.063
7qtk.pdb	17.24	0.5406	0.018	0.015
7n0a.pdb	16.14	0.6136	0.036	0.024
7lo8.pdb	20.49	0.6345	0.038	0.064
7lo7.pdb	21.03	0.6274	0.03	0.033
7kql.pdb	5.36	0.7713	0.152	0.161
7fjc.pdb	0.81	0.9883	0.799	0.879
7f7e.pdb	21.55	0.5812	0.074	0.101
7f6z.pdb	0.6	0.9939	0.912	0.948
7f6y.pdb	0.47	0.996	0.932	0.97
7eng.pdb	20.2	0.5597	0.039	0.013
7ek0.pdb	0.43	0.9967	0.931	0.967
7ejz.pdb	0.55	0.9946	0.897	0.954
7ejy.pdb	0.74	0.9903	0.832	0.91
7e9p.pdb	18.35	0.5694	0.047	0.062
	9.7071±8.7594	0.7727±0.1878	0.3417±0.3514	0.4136±0.3863
