# Supplementary material
Source: ML conference proceedings conference paper supplement (https://openreview.net/forum?id=ZuaVKlWdD2)
Supplement: supplementary_material [file DB5.5.xlsx]

## Sheet: ZDOCK
pdb_id	RMSD	TM-score	DockQ
2a9k.pdb	16.16	0.5568	0.014
1hcf.pdb	20.73	0.6584	0.011
1jiw.pdb	7.54	0.8533	0.07
1zhi.pdb	18.42	0.5977	0.01
2a1a.pdb	22.14	0.6134	0.007
1qa9.pdb	10.64	0.5851	0.083
1nw9.pdb	14.33	0.6854	0.022
5c7x.pdb	11.27	0.545	0.088
2ayo.pdb	5.97	0.8409	0.123
1jps.pdb	22.27	0.6874	0.015
1mlc.pdb	10.93	0.7837	0.037
1avx.pdb	7.39	0.6547	0.154
2sni.pdb	6.34	0.8547	0.146
6b0s.pdb	9.3	0.5864	0.092
3szk.pdb	21.61	0.6436	0.011
7cei.pdb	6.11	0.611	0.113
1ira.pdb	2.87	0.889	0.555
5jmo.pdb	12.91	0.8064	0.019
2vdb.pdb	7.28	0.7872	0.055
5hgg.pdb	7.23	0.7694	0.12
2sic.pdb	5.88	0.7894	0.167
1vfb.pdb	14.42	0.6728	0.053
1h1v.pdb	24.02	0.5371	0.007
4pou.pdb	14.02	0.5286	0.049
	12.4908±6.2941	0.6891±0.1141	0.0842±0.1127

## Sheet: ClusPro
pdb_id	RMSD	TM-score	DockQ
2a9k.pdb	18.83	0.5541	0.01
1hcf.pdb	13.3	0.6666	0.025
1jiw.pdb	9.1	0.8553	0.135
1zhi.pdb	23.46	0.5961	0.007
2a1a.pdb	8.28	0.6773	0.095
1qa9.pdb	18.21	0.5166	0.011
1nw9.pdb	12.76	0.6842	0.036
5c7x.pdb	10.85	0.5241	0.075
2ayo.pdb	12.97	0.7963	0.021
1jps.pdb	33.09	0.6642	0.004
1mlc.pdb	21.37	0.7622	0.01
1avx.pdb	6.94	0.687	0.177
2sni.pdb	2.31	0.9279	0.453
6b0s.pdb	13.76	0.5593	0.023
3szk.pdb	21.39	0.6412	0.008
7cei.pdb	3.56	0.7605	0.426
1ira.pdb	5.72	0.7656	0.195
5jmo.pdb	24.13	0.7973	0.006
2vdb.pdb	20.61	0.7733	0.006
5hgg.pdb	22.18	0.6601	0.008
2sic.pdb	1.51	0.9599	0.796
1vfb.pdb	11.75	0.6931	0.065
1h1v.pdb	18.84	0.5902	0.02
4pou.pdb	4.32	0.7354	0.229
	14.135±8.1527	0.702±0.1175	0.1184±0.1919

## Sheet: HDOCK
pdb_id	RMSD	TM-score	DockQ
2a9k.pdb	16.45	0.5545	0.012
1hcf.pdb	19.92	0.6573	0.01
1jiw.pdb	0.83	0.9906	0.91
1zhi.pdb	17.34	0.5977	0.01
2a1a.pdb	21.96	0.6131	0.006
1qa9.pdb	17.89	0.5173	0.013
1nw9.pdb	15.32	0.677	0.018
5c7x.pdb	10.2	0.5388	0.075
2ayo.pdb	2.04	0.9553	0.795
1jps.pdb	23.51	0.683	0.013
1mlc.pdb	9.28	0.79	0.05
1avx.pdb	1.49	0.9605	0.77
2sni.pdb	0.68	0.9902	0.904
6b0s.pdb	8.8	0.6664	0.458
3szk.pdb	16.48	0.647	0.014
7cei.pdb	1.76	0.9432	0.81
1ira.pdb	2.37	0.929	0.674
5jmo.pdb	14.46	0.8021	0.015
2vdb.pdb	4.25	0.8539	0.892
5hgg.pdb	19.51	0.6603	0.009
2sic.pdb	0.84	0.9863	0.922
1vfb.pdb	14.19	0.679	0.041
1h1v.pdb	24.34	0.5554	0.013
4pou.pdb	7.97	0.57	0.107
	11.3283±8.0733	0.7424±0.1667	0.3142±0.3895

## Sheet: EquiDock
pdb_id	RMSD	TM-score	DockQ
2a9k.pdb	21.74	0.5599	0.01
1hcf.pdb	6.79	0.7887	0.132
1jiw.pdb	8.26	0.844	0.048
1zhi.pdb	19.42	0.6402	0.019
2a1a.pdb	17.09	0.6318	0.008
1qa9.pdb	16.62	0.5231	0.012
1nw9.pdb	10.55	0.7562	0.047
5c7x.pdb	14.67	0.7944	0.015
2ayo.pdb	15.96	0.8311	0.014
1jps.pdb	12.62	0.7419	0.058
1mlc.pdb	10.8	0.8035	0.033
1avx.pdb	17.73	0.5894	0.018
2sni.pdb	8.35	0.8468	0.072
6b0s.pdb	8.94	0.8808	0.033
3szk.pdb	23.2	0.6552	0.006
7cei.pdb	10.19	0.6361	0.054
1ira.pdb	21.65	0.6973	0.013
5jmo.pdb	16.18	0.8094	0.015
2vdb.pdb	18.9	0.914	0.006
5hgg.pdb	26.4	0.6623	0.005
2sic.pdb	9.76	0.7508	0.042
1vfb.pdb	12.46	0.6572	0.032
1h1v.pdb	18.27	0.5436	0.009
4pou.pdb	13.01	0.5792	0.024
	14.9817±5.304	0.714±0.1142	0.0302±0.0288

## Sheet: Multimer
pdb_id	RMSD	TM-score	DockQ
2A9K.pdb	19.11	0.5549	0.01
1HCF.pdb	19.94	0.6571	0.01																								0
1JIW.pdb	0.76	0.9921	0.916																								0
1ZHI.pdb	1.49	0.9642	0.868																								1
2A1A.pdb	2.17	0.9312	0.71																								1
1QA9.pdb	0.81	0.9792	0.84																								1
1NW9.pdb	13.85	0.6746	0.019																								1
5C7X.pdb	12.66	0.5348	0.038																								0
2AYO.pdb	1.98	0.9593	0.803																								0
1JPS.pdb	15.01	0.6981	0.029																								1
1MLC.pdb	10.88	0.8003	0.043																								0
1AVX.pdb	1.01	0.9818	0.856																								0
2SNI.pdb	0.53	0.9938	0.917																								1
6B0S.pdb	8.86	0.6712	0.506																								1
3SZK.pdb	14.21	0.6881	0.071																								1
7CEI.pdb	1.45	0.9671	0.876																								0
1IRA.pdb	2.34	0.9324	0.679																								1
5JMO.pdb	24.05	0.7974	0.006																								1
2VDB.pdb	4.26	0.8564	0.877																								0
5HGG.pdb	2.98	0.8706	0.472																								1
2SIC.pdb	0.52	0.9947	0.959																								0
1VFB.pdb	10.61	0.7033	0.066																								1
1H1V.pdb	1.96	0.9606	0.669																								0
4POU.pdb	15.69	0.5335	0.014																								1
	7.7971±7.4284	0.8207±0.1619	0.4689±0.3957																								0
																											0.541667

## Sheet: BiDock
pdb_id	RMSD	TM-score	DockQ
2a9k.pdb	20.94	0.5671	0.031
1hcf.pdb	19.94	0.6571	0.01
1jiw.pdb	0.76	0.9922	0.918
1zhi.pdb	1.5	0.9637	0.861
2a1a.pdb	2.06	0.9385	0.704
1qa9.pdb	0.8	0.9794	0.824
1nw9.pdb	17.67	0.6737	0.047
5c7x.pdb	8.52	0.691	0.454
2ayo.pdb	1.98	0.9593	0.802
1jps.pdb	2.2	0.9452	0.747
1mlc.pdb	1.73	0.9621	0.821
1avx.pdb	1.06	0.9796	0.846
2sni.pdb	0.53	0.9938	0.916
6b0s.pdb	9.39	0.6603	0.583
3szk.pdb	15.62	0.6574	0.027
7cei.pdb	1.43	0.9685	0.881
1ira.pdb	2.35	0.9321	0.68
5jmo.pdb	24.44	0.7985	0.009
2vdb.pdb	4.25	0.8564	0.891
5hgg.pdb	17.92	0.6857	0.06
2sic.pdb	0.52	0.9948	0.959
1vfb.pdb	0.83	0.9883	0.8
1h1v.pdb	2.03	0.9571	0.658
4pou.pdb	16.25	0.5352	0.013
	7.28±8.1165	0.8474±0.1583	0.5643±0.3687
