# Supplementary material
Source: ML conference proceedings conference paper supplement (https://openreview.net/forum?id=ZuaVKlWdD2)
Supplement: supplementary_material [file VH-VL.xlsx]

## Sheet: ZDOCK
pdb_id	RMSD	TM-score	DockQ
8dls.pdb	14.17	0.568	0.078
8dlr.pdb	10.91	0.6061	0.1
8dfi.pdb	15.39	0.5386	0.018
8dfh.pdb	12.91	0.5334	0.013
8dcc.pdb	11.79	0.5483	0.021
8dad.pdb	7.4	0.6129	0.13
7zr8.pdb	7.48	0.5509	0.053
7zf8.pdb	13.89	0.5357	0.047
7xxl.pdb	3.55	0.7551	0.371
7xh8.pdb	3.61	0.771	0.479
7x26.pdb	14.15	0.5537	0.046
7wsl.pdb	9.94	0.5642	0.074
7wsi.pdb	8.89	0.5536	0.05
7ws6.pdb	4.58	0.6715	0.27
7ws2.pdb	6.8	0.6397	0.186
7wrz.pdb	8.99	0.5819	0.079
7wrv.pdb	8.32	0.5506	0.03
7wro.pdb	5.2	0.6384	0.252
7wrl.pdb	2.99	0.8273	0.499
7wrj.pdb	4.74	0.6435	0.212
7wog.pdb	9.25	0.576	0.052
7wlc.pdb	2.84	0.8175	0.562
7wef.pdb	14.87	0.5636	0.072
7wee.pdb	13.07	0.5835	0.084
7wed.pdb	8.99	0.584	0.124
7wcr.pdb	11.65	0.5517	0.048
7wbz.pdb	14.29	0.5671	0.051
7urq.pdb	12.59	0.5652	0.047
7uaq.pdb	15.55	0.5819	0.051
7tty.pdb	10.76	0.5749	0.047
7ttx.pdb	6.85	0.5859	0.076
7ttm.pdb	15.98	0.5887	0.079
7tpj.pdb	14.31	0.5482	0.02
7tp4.pdb	2.31	0.8665	0.523
7tp3.pdb	14.84	0.5957	0.069
7tlz.pdb	11.73	0.5552	0.061
7the.pdb	13.69	0.5794	0.077
7tc9.pdb	9.91	0.5606	0.056
7t8w.pdb	12.99	0.5788	0.082
7t7b.pdb	8.31	0.571	0.039
7t01.pdb	2.21	0.8801	0.598
7swp.pdb	16.65	0.5823	0.069
7su1.pdb	11.28	0.5362	0.023
7str.pdb	11.04	0.5504	0.035
7sem.pdb	14.91	0.5481	0.026
7sd5.pdb	16.23	0.5892	0.076
7sbu.pdb	14.41	0.5966	0.081
7sbg.pdb	6.49	0.5655	0.049
7sbd.pdb	8.79	0.5602	0.062
7sa6.pdb	14.71	0.5667	0.052
7s5p.pdb	11.73	0.5578	0.07
7rxp.pdb	14.26	0.6003	0.067
7rxi.pdb	11.81	0.5942	0.042
7rbu.pdb	10.46	0.5649	0.041
7qtk.pdb	13.92	0.583	0.038
7n0a.pdb	9.07	0.5387	0.05
7lo8.pdb	14.62	0.6023	0.071
7lo7.pdb	14.23	0.5687	0.03
7kql.pdb	16.82	0.5688	0.044
7fjc.pdb	9.8	0.61	0.111
7f7e.pdb	14.42	0.6009	0.07
7f6z.pdb	12.76	0.5628	0.061
7f6y.pdb	11.05	0.5638	0.067
7eng.pdb	13.05	0.5766	0.069
7ek0.pdb	11.16	0.5675	0.074
7ejz.pdb	13.97	0.5642	0.058
7ejy.pdb	13.99	0.5405	0.057
7e9p.pdb	12.51	0.5517	0.025
	10.9828±3.8934	0.5961±0.0761	0.108±0.1349

## Sheet: ClusPro
pdb_id	RMSD	TM-score	DockQ
8dls.pdb	1.86	0.9114	0.624
8dlr.pdb	3.52	0.7797	0.387
8dfi.pdb	12.35	0.5448	0.046
8dfh.pdb	2.72	0.8439	0.346
8dcc.pdb	1.95	0.9024	0.483
8dad.pdb	0.73	0.9838	0.924
7zr8.pdb	2.51	0.851	0.408
7zf8.pdb	0.67	0.9858	0.908
7xxl.pdb	15.23	0.5963	0.072
7xh8.pdb	14.81	0.5884	0.061
7x26.pdb	2.31	0.8662	0.428
7wsl.pdb	14.42	0.5721	0.092
7wsi.pdb	2.45	0.8601	0.436
7ws6.pdb	1.78	0.918	0.609
7ws2.pdb	15.78	0.5819	0.064
7wrz.pdb	2.02	0.8921	0.637
7wrv.pdb	2.67	0.8425	0.288
7wro.pdb	1.53	0.9336	0.703
7wrl.pdb	13.34	0.5826	0.052
7wrj.pdb	1.49	0.9388	0.622
7wog.pdb	1.79	0.9183	0.63
7wlc.pdb	8.73	0.5858	0.081
7wef.pdb	3.49	0.7728	0.361
7wee.pdb	14.16	0.5772	0.073
7wed.pdb	1.45	0.9405	0.757
7wcr.pdb	2.69	0.85	0.297
7wbz.pdb	1.96	0.9016	0.491
7urq.pdb	2.33	0.8702	0.422
7uaq.pdb	14.51	0.5639	0.047
7tty.pdb	16.44	0.5818	0.042
7ttx.pdb	1.37	0.9478	0.75
7ttm.pdb	1.58	0.9346	0.639
7tpj.pdb	1.81	0.9114	0.506
7tp4.pdb	15.49	0.5855	0.064
7tp3.pdb	1.6	0.9318	0.715
7tlz.pdb	1.87	0.9082	0.68
7the.pdb	15.16	0.5869	0.06
7tc9.pdb	14.26	0.547	0.039
7t8w.pdb	2.95	0.8165	0.385
7t7b.pdb	1.54	0.9342	0.717
7t01.pdb	13.44	0.578	0.051
7swp.pdb	1.15	0.9625	0.698
7su1.pdb	11.8	0.5546	0.076
7str.pdb	10.18	0.61	0.109
7sem.pdb	10.3	0.6076	0.111
7sd5.pdb	1.41	0.9451	0.744
7sbu.pdb	14.56	0.6026	0.082
7sbg.pdb	15.27	0.5717	0.07
7sbd.pdb	1.4	0.9419	0.771
7sa6.pdb	2.48	0.8628	0.441
7s5p.pdb	3.19	0.8175	0.2
7rxp.pdb	1.66	0.9273	0.593
7rxi.pdb	1.82	0.9111	0.531
7rbu.pdb	12.66	0.5873	0.086
7qtk.pdb	2.43	0.8585	0.443
7n0a.pdb	1.9	0.9118	0.584
7lo8.pdb	2.45	0.867	0.377
7lo7.pdb	2.07	0.8921	0.614
7kql.pdb	0.79	0.9809	0.909
7fjc.pdb	1.61	0.9271	0.667
7f7e.pdb	9.03	0.6215	0.135
7f6z.pdb	1.61	0.9265	0.692
7f6y.pdb	1.61	0.9262	0.717
7eng.pdb	15.48	0.577	0.054
7ek0.pdb	2.56	0.8414	0.498
7ejz.pdb	2.26	0.875	0.415
7ejy.pdb	0.92	0.9741	0.801
7e9p.pdb	15.78	0.5807	0.084
	5.8991±5.7302	0.7924±0.1575	0.4044±0.2791

## Sheet: HDOCK
pdb_id	RMSD	TM-score	DockQ
8dls.pdb	0.99	0.9726	0.784
8dlr.pdb	3.34	0.7782	0.409
8dfi.pdb	1.61	0.942	0.718
8dfh.pdb	6.66	0.5485	0.085
8dcc.pdb	0.74	0.9859	0.888
8dad.pdb	1	0.9718	0.874
7zr8.pdb	1.09	0.9678	0.783
7zf8.pdb	1.07	0.9663	0.841
7xxl.pdb	1.36	0.9661	0.767
7xh8.pdb	1.23	0.961	0.846
7x26.pdb	1.52	0.9461	0.803
7wsl.pdb	0.57	0.9899	0.935
7wsi.pdb	1.51	0.9561	0.703
7ws6.pdb	1.51	0.9504	0.692
7ws2.pdb	1.49	0.9516	0.7
7wrz.pdb	1.48	0.9547	0.789
7wrv.pdb	1.33	0.9565	0.793
7wro.pdb	1.13	0.9679	0.8
7wrl.pdb	2.34	0.9312	0.641
7wrj.pdb	1.94	0.9523	0.642
7wog.pdb	1.82	0.9199	0.696
7wlc.pdb	1.34	0.9506	0.731
7wef.pdb	1.41	0.9451	0.75
7wee.pdb	1.71	0.9299	0.661
7wed.pdb	1.65	0.9285	0.756
7wcr.pdb	1.2	0.9637	0.74
7wbz.pdb	1.03	0.9778	0.785
7urq.pdb	0.52	0.9916	0.944
7uaq.pdb	6.9	0.584	0.126
7tty.pdb	1.62	0.9485	0.698
7ttx.pdb	1.6	0.9472	0.69
7ttm.pdb	1.55	0.9514	0.71
7tpj.pdb	1.15	0.9675	0.757
7tp4.pdb	2.06	0.9258	0.604
7tp3.pdb	1.06	0.9722	0.861
7tlz.pdb	0.61	0.9881	0.947
7the.pdb	1.55	0.9372	0.739
7tc9.pdb	2.2	0.8877	0.565
7t8w.pdb	0.66	0.9867	0.905
7t7b.pdb	1.61	0.9618	0.808
7t01.pdb	1.29	0.9621	0.779
7swp.pdb	1.71	0.9421	0.75
7su1.pdb	0.79	0.9814	0.915
7str.pdb	1.25	0.9635	0.75
7sem.pdb	0.61	0.989	0.886
7sd5.pdb	1.57	0.9497	0.704
7sbu.pdb	1.69	0.9393	0.768
7sbg.pdb	0.82	0.9795	0.864
7sbd.pdb	0.79	0.9805	0.843
7sa6.pdb	15.28	0.5677	0.045
7s5p.pdb	1.19	0.9668	0.727
7rxp.pdb	3.24	0.9338	0.536
7rxi.pdb	1.46	0.9638	0.727
7rbu.pdb	2.15	0.9204	0.686
7qtk.pdb	1.74	0.946	0.622
7n0a.pdb	1.37	0.9541	0.794
7lo8.pdb	3.63	0.8838	0.461
7lo7.pdb	2.25	0.9369	0.623
7kql.pdb	1.59	0.9348	0.744
7fjc.pdb	12.19	0.57	0.072
7f7e.pdb	2.22	0.8963	0.589
7f6z.pdb	0.75	0.9825	0.868
7f6y.pdb	0.86	0.977	0.859
7eng.pdb	6.18	0.6814	0.176
7ek0.pdb	0.83	0.9785	0.855
7ejz.pdb	0.89	0.9757	0.812
7ejy.pdb	0.84	0.9783	0.853
7e9p.pdb	1.82	0.9465	0.661
	2.0318±2.4054	0.9259±0.1011	0.7049±0.2023

## Sheet: EquiDock
pdb_id	RMSD	TM-score	DockQ
7e9p.pdb	18.92	0.5564	0.027
7ejy.pdb	19.22	0.5437	0.026
7ejz.pdb	19.22	0.5437	0.026
7ek0.pdb	19.22	0.5438	0.026
7eng.pdb	16.8	0.5486	0.029
7f6y.pdb	19.22	0.5437	0.026
7f6z.pdb	19.22	0.5437	0.026
7f7e.pdb	17.81	0.5687	0.025
7fjc.pdb	18.34	0.5514	0.021
7kql.pdb	17.76	0.563	0.031
7lo7.pdb	14.35	0.5944	0.055
7lo8.pdb	16.22	0.591	0.048
7n0a.pdb	14.75	0.5481	0.04
7qtk.pdb	14.25	0.5658	0.035
7rbu.pdb	17.26	0.5853	0.05
7rxi.pdb	13.42	0.5858	0.072
7rxp.pdb	19.56	0.5584	0.019
7s5p.pdb	16.07	0.5736	0.052
7sa6.pdb	19.29	0.5451	0.022
7sbd.pdb	20.1	0.5329	0.017
7sbg.pdb	20.1	0.5329	0.017
7sbu.pdb	21.05	0.5619	0.019
7sd5.pdb	22.63	0.5558	0.015
7sem.pdb	18.8	0.5633	0.033
7str.pdb	22.13	0.5453	0.017
7su1.pdb	22	0.5368	0.018
7swp.pdb	21.99	0.5505	0.015
7t01.pdb	16.14	0.5877	0.068
7t7b.pdb	18.51	0.5738	0.027
7t8w.pdb	19.29	0.5548	0.018
7tc9.pdb	19.63	0.5625	0.03
7the.pdb	13.89	0.5633	0.037
7tlz.pdb	17.34	0.5673	0.037
7tp3.pdb	17	0.5671	0.03
7tp4.pdb	16.06	0.5781	0.046
7tpj.pdb	13.78	0.5745	0.051
7ttm.pdb	22.63	0.5558	0.015
7ttx.pdb	22.63	0.5558	0.015
7tty.pdb	22.63	0.5558	0.015
7uaq.pdb	12.93	0.5678	0.047
7urq.pdb	17.66	0.5471	0.031
7wbz.pdb	16.12	0.562	0.044
7wcr.pdb	17.3	0.5242	0.023
7wed.pdb	22.29	0.5443	0.013
7wee.pdb	19.42	0.5396	0.02
7wef.pdb	24.09	0.5298	0.013
7wlc.pdb	13.02	0.5931	0.088
7wog.pdb	18.04	0.5617	0.038
7wrj.pdb	22.33	0.5568	0.016
7wrl.pdb	18.05	0.591	0.041
7wro.pdb	18.92	0.5345	0.021
7wrv.pdb	15.83	0.5845	0.056
7wrz.pdb	24.11	0.5313	0.013
7ws2.pdb	14.98	0.5855	0.06
7ws6.pdb	14.99	0.5855	0.06
7wsi.pdb	18.4	0.5464	0.029
7wsl.pdb	14.33	0.5601	0.043
7x26.pdb	20.47	0.55	0.023
7xh8.pdb	18.11	0.5637	0.026
7xxl.pdb	17.56	0.575	0.032
7zf8.pdb	15.55	0.5596	0.05
7zr8.pdb	20.16	0.5445	0.021
8dad.pdb	16.4	0.5645	0.03
8dcc.pdb	22.5	0.5462	0.014
8dfh.pdb	15.15	0.5505	0.032
8dfi.pdb	14.55	0.5642	0.04
8dlr.pdb	19.24	0.563	0.025
8dls.pdb	22.19	0.5485	0.016
	18.2929±2.8923	0.5589±0.017	0.0318±0.0161

## Sheet: Multimer
pdb_id	RMSD	TM-score	DockQ
8dls.pdb	2.2	0.9295	0.606
8dlr.pdb	1.45	0.9599	0.766
8dfi.pdb	1.53	0.9507	0.687
8dfh.pdb	1.45	0.9479	0.677
8dcc.pdb	1.49	0.9643	0.731
8dad.pdb	1.2	0.9675	0.895
7zr8.pdb	0.8	0.984	0.82
7zf8.pdb	0.77	0.9852	0.864
7xxl.pdb	1.45	0.9677	0.731
7xh8.pdb	1.1	0.9683	0.817
7x26.pdb	1.42	0.9558	0.816
7wsl.pdb	0.39	0.995	0.966
7wsi.pdb	0.9	0.9791	0.807
7ws6.pdb	1.1	0.9666	0.801
7ws2.pdb	1.06	0.9684	0.823
7wrz.pdb	1.51	0.9544	0.792
7wrv.pdb	1.38	0.9647	0.813
7wro.pdb	1.25	0.9634	0.78
7wrl.pdb	2.83	0.9224	0.603
7wrj.pdb	1.11	0.9684	0.773
7wog.pdb	1.53	0.9421	0.749
7wlc.pdb	1.47	0.9432	0.681
7wef.pdb	1.26	0.9605	0.783
7wee.pdb	1.62	0.9352	0.636
7wed.pdb	1.12	0.9645	0.868
7wcr.pdb	1.11	0.9711	0.743
7wbz.pdb	1.03	0.9807	0.781
7urq.pdb	0.86	0.982	0.822
7uaq.pdb	2.06	0.9342	0.634
7tty.pdb	1.64	0.955	0.685
7ttx.pdb	1.59	0.9564	0.674
7ttm.pdb	1.57	0.96	0.685
7tpj.pdb	1.16	0.9728	0.756
7tp4.pdb	1.58	0.9472	0.664
7tp3.pdb	1.79	0.9621	0.803
7tlz.pdb	1.4	0.9666	0.626
7the.pdb	1.29	0.9625	0.778
7tc9.pdb	2.36	0.8898	0.556
7t8w.pdb	1.6	0.9583	0.683
7t7b.pdb	0.62	0.9888	0.923
7t01.pdb	1.07	0.9694	0.87
7swp.pdb	1.17	0.97	0.802
7su1.pdb	0.7	0.9859	0.908
7str.pdb	0.93	0.977	0.824
7sem.pdb	0.72	0.9883	0.855
7sd5.pdb	1.58	0.9582	0.696
7sbu.pdb	1.02	0.9716	0.862
7sbg.pdb	0.66	0.9864	0.915
7sbd.pdb	0.53	0.9909	0.911
7sa6.pdb	1.02	0.9779	0.803
7s5p.pdb	0.99	0.9802	0.772
7rxp.pdb	2	0.9567	0.634
7rxi.pdb	1	0.9731	0.795
7rbu.pdb	2.25	0.9206	0.716
7qtk.pdb	1.65	0.9558	0.664
7n0a.pdb	1.02	0.9737	0.884
7lo8.pdb	3.49	0.8944	0.491
7lo7.pdb	2.18	0.9391	0.653
7kql.pdb	1.29	0.9685	0.772
7fjc.pdb	1.31	0.9652	0.808
7f7e.pdb	1.6	0.9445	0.695
7f6z.pdb	0.89	0.9769	0.812
7f6y.pdb	0.98	0.9719	0.814
7eng.pdb	0.77	0.983	0.863
7ek0.pdb	0.96	0.9734	0.808
7ejz.pdb	1.06	0.9675	0.766
7ejy.pdb	1.02	0.9698	0.793
7e9p.pdb	1.19	0.9665	0.75
	1.325±0.5301	0.9625±0.0202	0.7652±0.0944

## Sheet: BiDock
pdb_id	RMSD	TM-score	DockQ
8dls.pdb	0.84	0.9801	0.811
8dlr.pdb	1.29	0.9537	0.796
8dfi.pdb	1.35	0.9638	0.726
8dfh.pdb	1.28	0.9587	0.706
8dcc.pdb	0.58	0.9923	0.907
8dad.pdb	0.84	0.9803	0.898
7zr8.pdb	0.83	0.9814	0.837
7zf8.pdb	0.97	0.9729	0.792
7xxl.pdb	1.41	0.9696	0.741
7xh8.pdb	1.15	0.9675	0.822
7x26.pdb	1.36	0.9587	0.827
7wsl.pdb	0.46	0.9933	0.943
7wsi.pdb	1.35	0.9673	0.725
7ws6.pdb	1.38	0.9594	0.71
7ws2.pdb	1.34	0.9623	0.727
7wrz.pdb	1.42	0.9596	0.803
7wrv.pdb	1.12	0.9727	0.802
7wro.pdb	1.45	0.9456	0.696
7wrl.pdb	2.35	0.9317	0.616
7wrj.pdb	2.09	0.9525	0.588
7wog.pdb	1.57	0.9405	0.71
7wlc.pdb	1.26	0.9571	0.722
7wef.pdb	1.28	0.958	0.758
7wee.pdb	1.62	0.9355	0.632
7wed.pdb	1.26	0.9564	0.826
7wcr.pdb	1.06	0.9726	0.72
7wbz.pdb	0.86	0.985	0.808
7urq.pdb	0.34	0.9963	0.949
7uaq.pdb	1.73	0.9389	0.687
7tty.pdb	1.34	0.9616	0.735
7ttx.pdb	1.32	0.961	0.729
7ttm.pdb	1.28	0.9642	0.736
7tpj.pdb	1.02	0.9774	0.787
7tp4.pdb	1.79	0.9501	0.641
7tp3.pdb	1.04	0.977	0.848
7tlz.pdb	0.34	0.9963	0.972
7the.pdb	1.19	0.9631	0.764
7tc9.pdb	2.05	0.901	0.605
7t8w.pdb	0.47	0.9931	0.929
7t7b.pdb	1.54	0.9651	0.805
7t01.pdb	1.31	0.9608	0.759
7swp.pdb	1.61	0.9551	0.759
7su1.pdb	0.64	0.9878	0.916
7str.pdb	1.03	0.9753	0.777
7sem.pdb	0.55	0.9911	0.884
7sd5.pdb	1.3	0.9628	0.734
7sbu.pdb	1.61	0.9474	0.762
7sbg.pdb	0.66	0.9866	0.898
7sbd.pdb	0.54	0.9907	0.882
7sa6.pdb	0.48	0.9931	0.958
7s5p.pdb	0.95	0.9811	0.783
7rxp.pdb	3.13	0.9417	0.546
7rxi.pdb	1.38	0.9669	0.712
7rbu.pdb	2.07	0.9299	0.688
7qtk.pdb	1.54	0.9634	0.637
7n0a.pdb	1.06	0.974	0.843
7lo8.pdb	3.55	0.8928	0.501
7lo7.pdb	2.2	0.9451	0.632
7kql.pdb	0.98	0.9755	0.796
7fjc.pdb	0.91	0.9758	0.81
7f7e.pdb	1.88	0.9305	0.639
7f6z.pdb	0.48	0.9929	0.891
7f6y.pdb	0.54	0.991	0.891
7eng.pdb	1.46	0.9671	0.756
7ek0.pdb	0.51	0.992	0.885
7ejz.pdb	0.65	0.9871	0.838
7ejy.pdb	0.58	0.9896	0.871
7e9p.pdb	1.69	0.9601	0.663
	1.2428±0.6027	0.9659±0.0214	0.7728±0.1032
